# Supplementary material for: Actinin BioID reveals sarcomere crosstalk with oxidative metabolism through interactions with IGF2BP2
Source: PubMed Central journal article supplement — Cell Rep. Author manuscript; Available in PMC 2021 Sep 17. (PMC8447243; doi:10.1016/j.celrep.2021.109512), 2021-08-10
Supplement: NIHMS1732334-supplement-1.pdf [file NIHMS1732334-supplement-1.pdf]

**Supplemental information**

**Actinin BioID reveals sarcomere  
crosstalk with oxidative metabolism  
through interactions with IGF2BP2**

**Feria A. Ladha, Ketan Thakar, Anthony M. Pettinato, Nicholas Legere, Shahnaz Ghahremani, Rachel Cohn, Robert Romano, Emily Meredith, Yu-Sheng Chen, and J. Travis Hinson**

**Figure S1**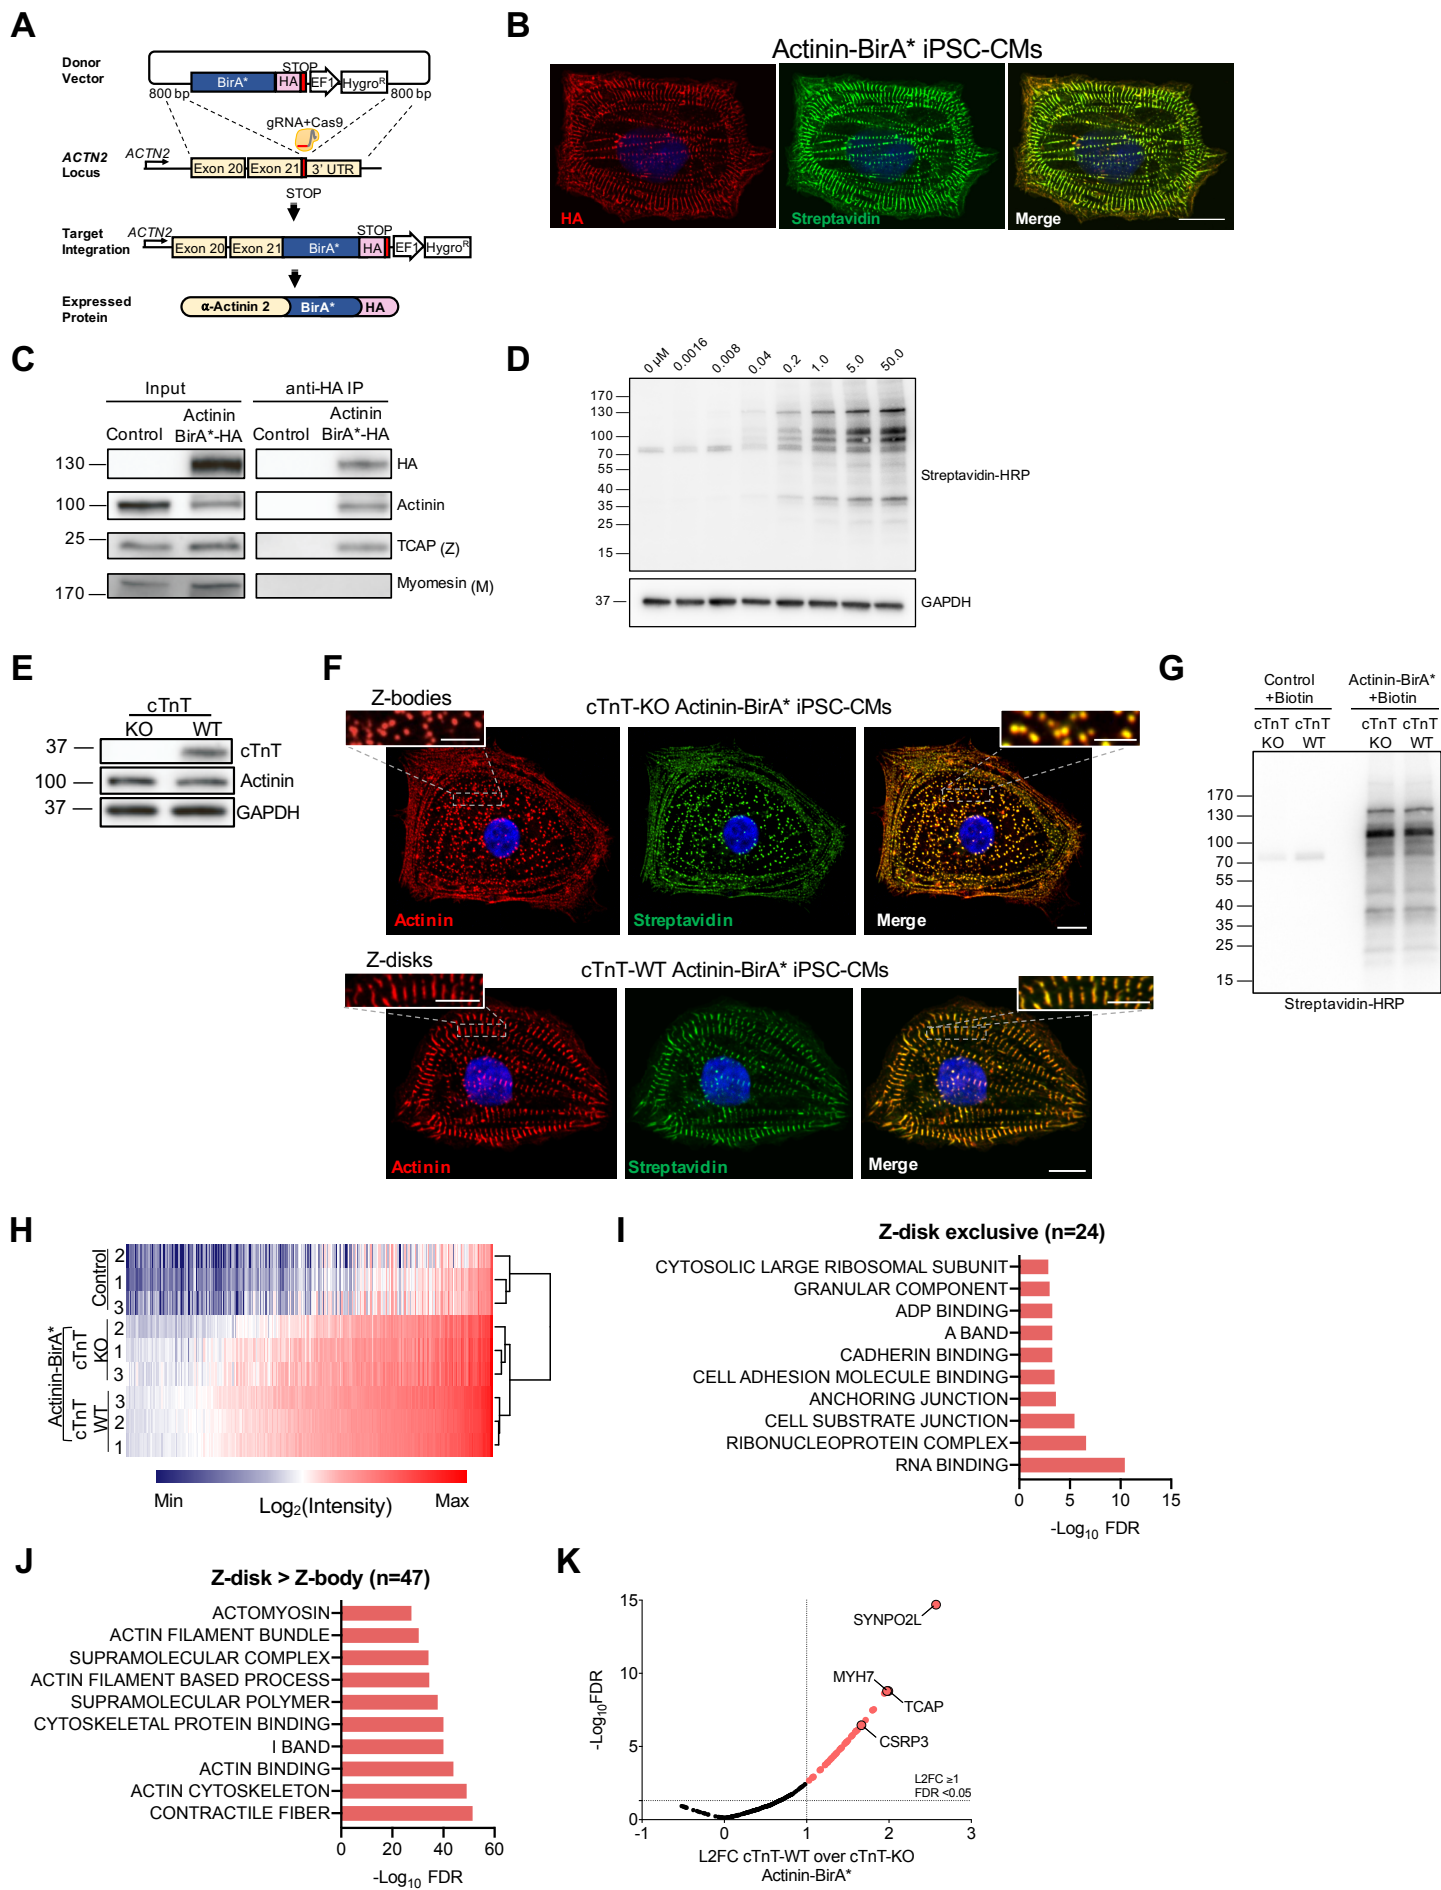

**Figure S1. BioID to identify actinin proximity partners through sarcomere assembly. (Related to Figure 1)**

**(A)** Overview of gene-targeting strategy to generate an in-frame knock-in of BirA\*-HA at the *ACTN2* locus in iPSCs. CRISPR/Cas9 and homology-directed repair from a donor vector containing BirA\*-HA and 800bp *ACTN2* homology arms was utilized.

**(B)** Confocal micrograph of Actinin-BirA\* iPSC-CMs decorated with antibodies to HA (red), streptavidin-AF488 (green), and DAPI DNA co-stain (blue) showing overlap (scale bar=10µm).

**(C)** To validate localization, iPSC-CM lysates were immunoprecipitated using an anti-HA antibody and probed with antibodies to known sarcomere components at the Z-disk (anti-TCAP) and M-line (anti-myomesin), as well as anti-HA and anti-actinin controls.

**(D)** Representative immunoblot probed with streptavidin-HRP to optimize biotin labeling after 24 hours of biotin supplementation up to 50 µM.

**(E)** Representative immunoblot of cTnT-KO and cTnT-WT iPSC-CMs lysates probed for cTnT, actinin and GAPDH control.

**(F)** Confocal micrograph of cTnT-KO and cTnT-WT Actinin-BirA\* iPSC-CMs decorated with antibodies to actinin (red), streptavidin-AF488 (green), and DAPI DNA co-stain (blue) (scale bars: main image=10µm; inset=5µm). In contrast to the Z-disks observed in cTnT-WT iPSC-CMs (bottom), cTnT-KO iPSC-CMs have punctate Z-bodies (top).

**(G)** Representative immunoblot of cTnT-KO and cTnT-WT Actinin-BirA\* lysates probed with streptavidin-HRP.

**(H)** Significant hits from TMT experiment 2 using hierarchical clustering and heatmap of Log<sub>2</sub>-transformed intensity values for the 294 Actinin-BirA\*-enriched proteins compared to control non-BirA\* (L2FC ≥1 and FDR <0.05). **(I)** 24 actinin neighborhood proteins that were exclusive to the Z-disk stage assembly were analyzed by GO and enrichment terms are listed (L2FC ≥1 and FDR <0.05 in cTnT-WT relative to control non-BirA\*).

**(J)** 47 proteins enriched with cTnT-dependent sarcomere assembly were analyzed by GO and enrichment terms are listed (L2FC ≥1 and FDR <0.05 in cTnT-WT relative to cTnT-KO).

**(K)** -Log<sub>10</sub>FDR (y-axis) plotted against the L2FC of cTnT-WT samples relative to cTnT-KO (x-axis) using the 294 Actinin-BirA\*-enriched proteins, which identified 47 proteins (pink) that are further enriched with cTnT-dependent sarcomere assembly (L2FC ≥1 and FDR <0.05).

**A**

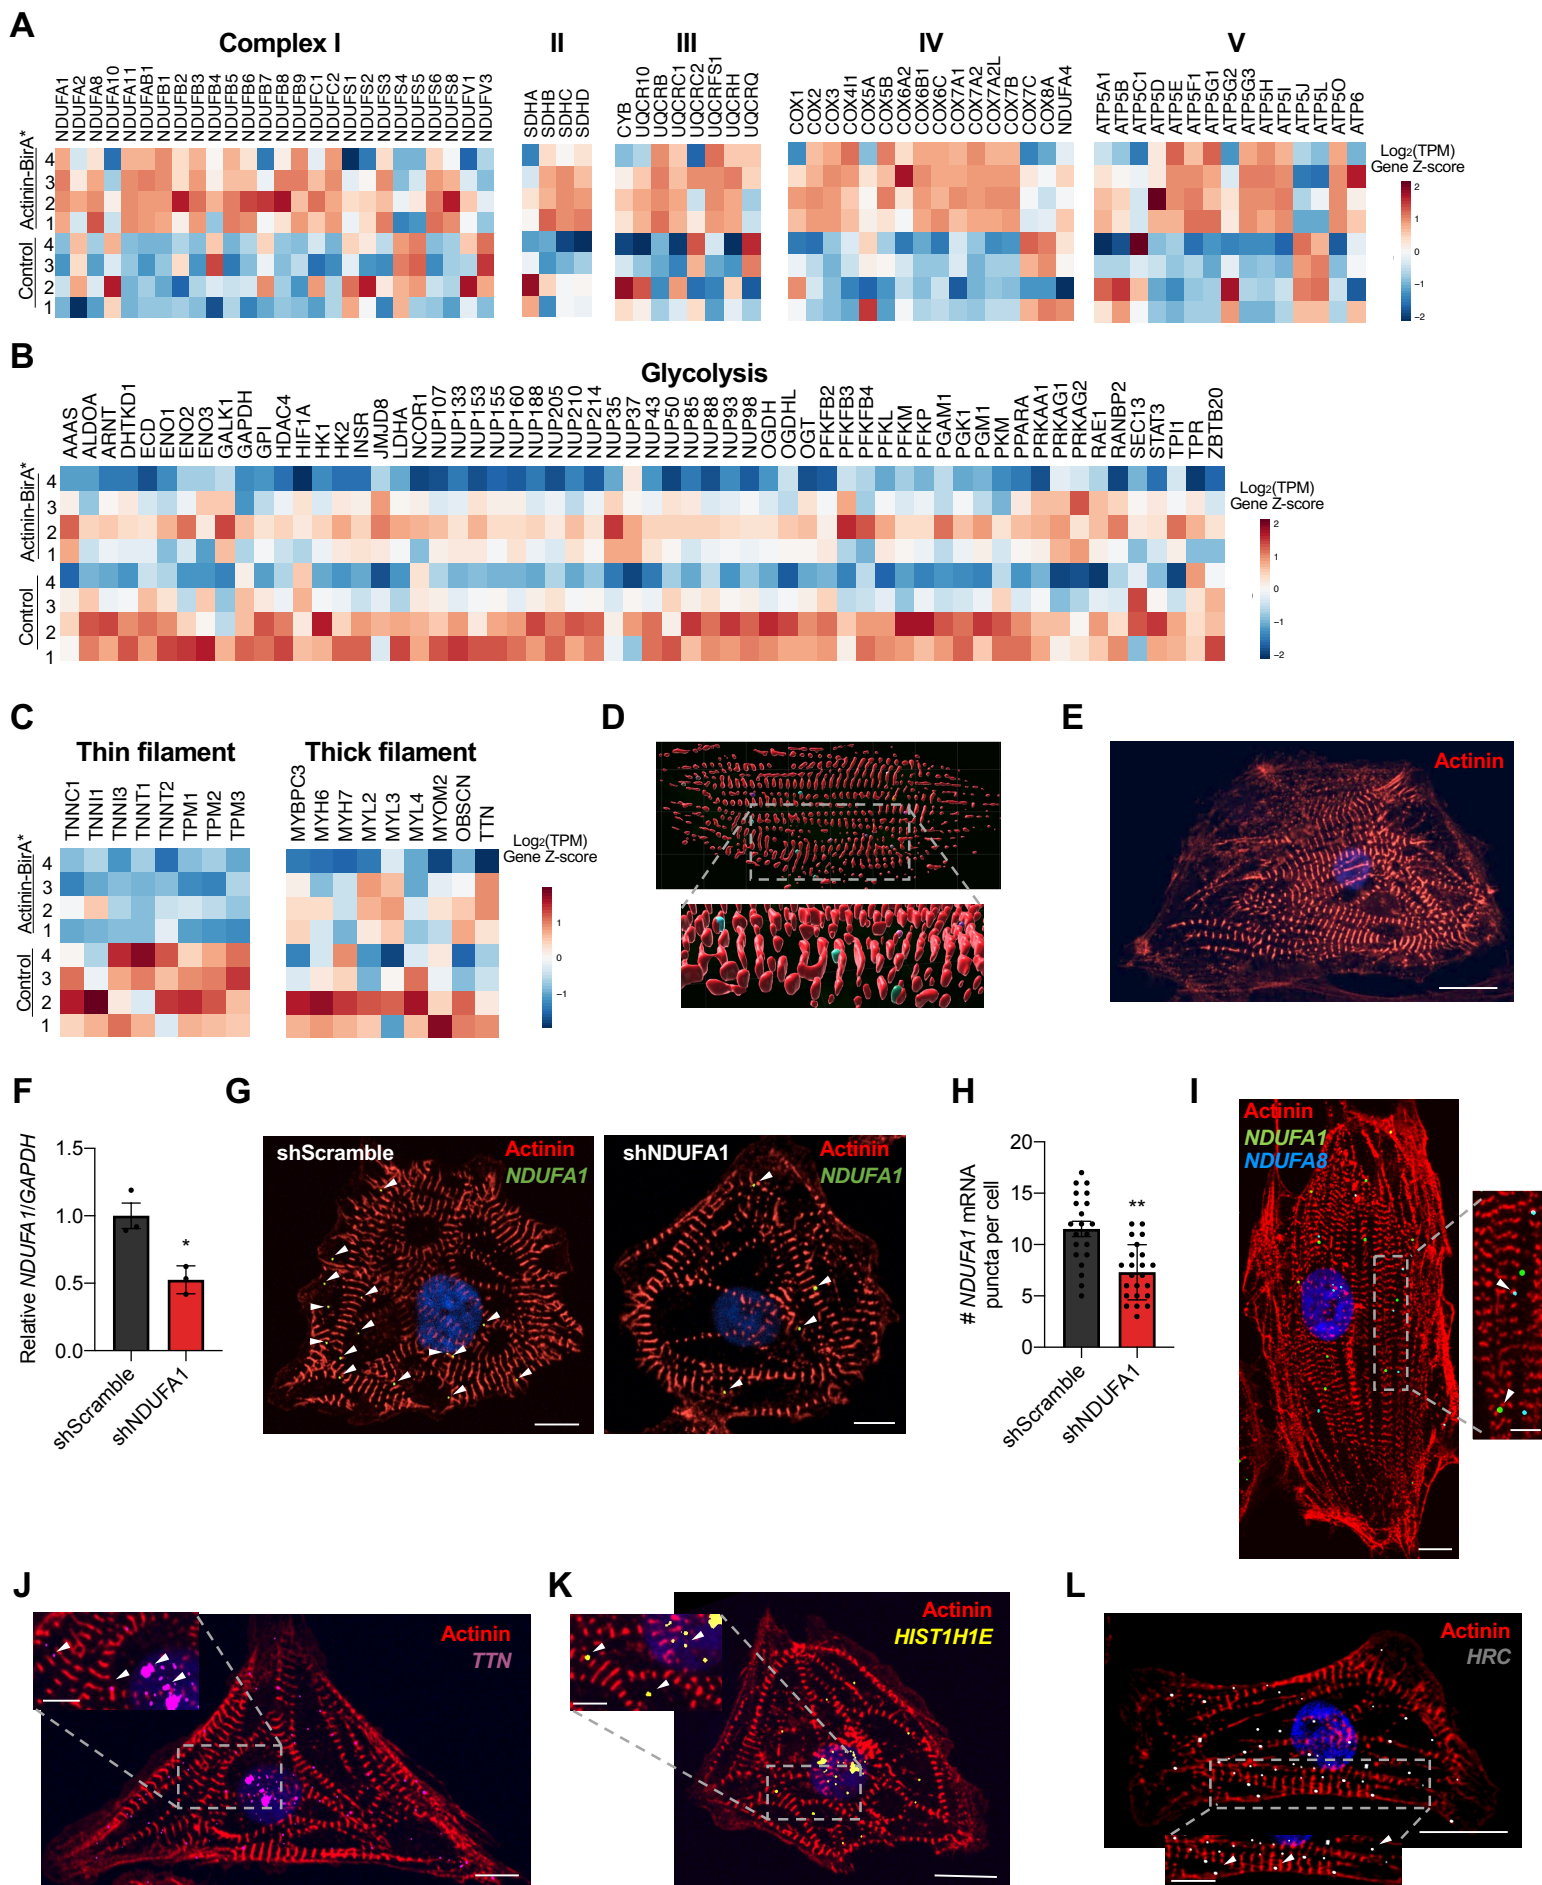

**Figure S2. Identification of transcripts bound to RNA-binding proteins in actinin neighborhoods. (Related to Figure 2)**

**(A)** Heatmap displaying relative expression of ETC Complexes (I-V) genes in control non-BirA\* and Actinin-BirA\* RIP-seq samples.

**(B)** Heatmap displaying relative expression of glycolysis genes in control non-BirA\* vs. Actinin-BirA\* RIP-seq samples.

**(C)** Heatmap displaying relative expression of sarcomere thin and thick filament genes in control non-BirA\* vs. Actinin-BirA\* RIP-seq samples.

**(D)** Representative image from Imaris utilizing distance transformation tool to determine distance between actinin puncta (red) and mRNA puncta (multi-colored).

**(E)** Representative control confocal micrograph of iPSC-CMs decorated with antibodies to actinin (red) and DAPI DNA co-stain (blue) without RNA FISH probe (scale bar=10µm).

**(F)** qPCR analysis of transcript levels of *NDUFA1* after *NDUFA1* knockdown.

**(G)** Representative confocal micrographs of iPSC-CMs transduced with either shScramble or shNDUFA1 and decorated with antibodies to actinin (red), DAPI DNA co-stain (blue), and RNA FISH probes against *NDUFA1* (green) (scale bar=10µm).

**(H)** Quantification of *NDUFA1* mRNA puncta per cell comparing iPSC-CMs transduced with either shScramble or shNDUFA1 (n=20).

**(I)** RNA FISH of ETC Complex I components *NDUFA1* and *NDUFA8* that are both in proximity to actinin but not overlapped (scale bars: main image=10µm; inset=5µm).

**(J)** Representative confocal micrograph of iPSC-CMs decorated with antibodies to actinin (red), DAPI DNA co-stain (blue), and RNA FISH probe against *TTN* (purple) (scale bars: main image=10µm; inset=5µm).

**(K)** Representative confocal micrograph of iPSC-CMs decorated with antibodies to actinin (red), DAPI DNA co-stain (blue), and RNA FISH probe against *HIST1H1E* (yellow) (scale bars: main image=10µm; inset=5µm).

**(L)** Representative confocal micrograph of iPSC-CMs decorated with antibodies to actinin (red), DAPI DNA co-stain (blue), and RNA FISH probe against *HRC* (gray) (scale bars: main image=10µm; inset=5µm).

Data are n≥3; mean ± SEM; significance assessed by Student's t-test (F, H) and defined by *P* <0.05 (\*), *P* ≤ 0.01 (\*\*).

Figure S3

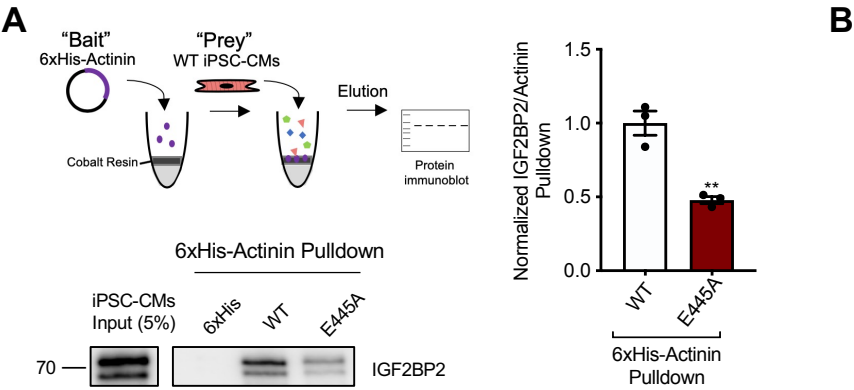

**B**

| RNA Binding Protein | Method |       |       |     |
|---------------------|--------|-------|-------|-----|
|                     | TMT    | SP-IP | HA-IP | M2H |
| IGF2BP2             | +      | +     | +     | +   |
| PCBP1               | +      | +     | +     | -   |
| PCBP2               | +      | +     | +     | -   |
| SERBP1              | +      | +     | -     | -   |

**Figure S3. Fine mapping actinin interactions with the RNA-binding protein IGF2BP2. (Related to Figure 3)**

**A)** Purified recombinant 6xHis, 6xHis-Actinin-WT, and 6xHis-Actinin-E445A were incubated with iPSC-CM lysate in resin (diagram), and precipitates were analyzed (left) and quantified (right) by immunoblotting with anti-Actinin antibody. Equal amounts of each recombinant protein were loaded onto resin.

**B)** Summary overview of RBP and actinin interaction data.

Data are n=3; mean  $\pm$  SEM; significance assessed by Student's t-test (A) and defined by  $P \leq 0.01$  (\*\*).

**Figure S4**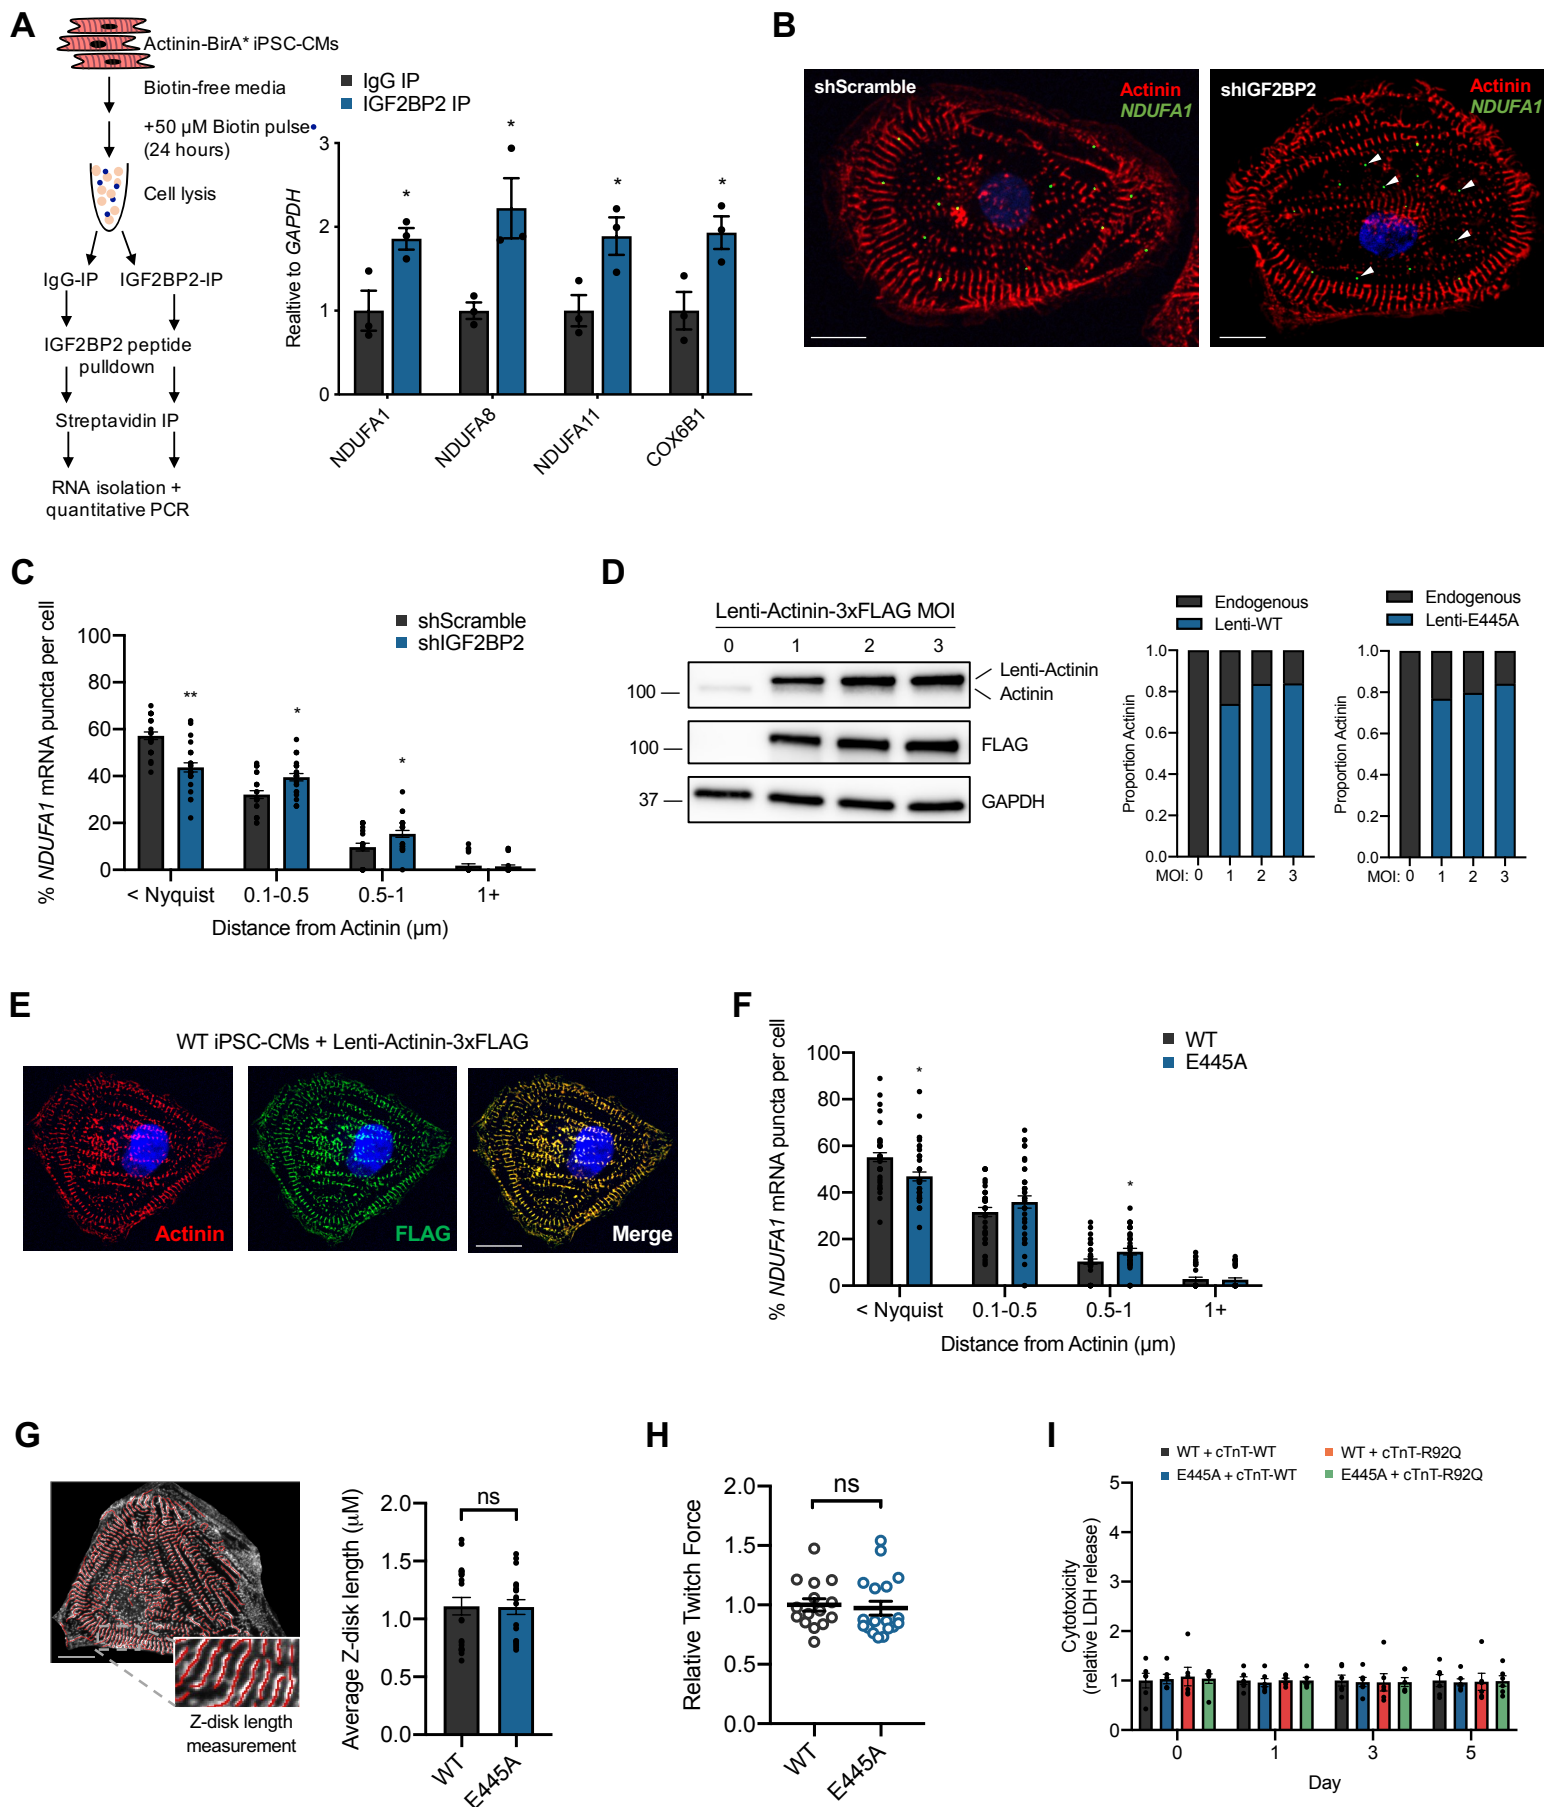

**Figure S4. Actinin-IGF2BP2 interactions regulate ETC transcript localization to actinin neighborhoods and metabolic adaptation to hypercontractility in an HCM model. (Related to Figure 4)**

**(A)** Overview of tandem-IP process (left) and qPCR results of IgG vs. IGF2BP2 IP (right) for candidate ETC transcripts.

**(B)** Representative confocal micrographs of iPSC-CMs transduced with shScramble or shIGF2BP2 and decorated with antibodies to actinin (red), DAPI DNA co-stain (blue), and RNA FISH probes against *NDUFA1* (green) (scale bar=10µm).

**(C)** Quantification of *NDUFA1* RNA proximity to actinin protein in iPSC-CMs treated with shScramble or shIGF2BP2 (n=25 cells).

**(D)** Representative immunoblots (left) and quantification (right) of MOI testing for lenti-Actinin-3x-FLAG to assess proportion of endogenous and overexpressed actinin levels.

**(E)** Representative confocal micrograph of iPSC-CMs decorated with antibodies to actinin (red), FLAG (green), and DAPI DNA co-stain (blue) showing appropriate localization of overexpression lenti-Actinin-3x-FLAG (scale bar=10µm).

**(F)** Quantification of *NDUFA1* RNA proximity to actinin protein in iPSC-CMs treated with overexpression of lenti-Actinin-WT or lenti-Actinin-E445A (n=40 cells).

**(G)** Quantification of Z-disk length by actinin stain of iPSC-CMs overexpressing lenti-Actinin-WT or lenti-Actinin-E445A (n=20) (scale bar=10µm).

**(H)** Cardiac microtissues with overexpression of lenti-Actinin-WT vs. lenti-Actinin-E445A have similar twitch force compared to controls (n=15-18).

**(I)** LDH activity of media supernatant collected from iPSC-CMs expressing either lenti-Actinin-WT or lenti-Actinin-E445A with lenti-cTnT-WT or lenti-cTnT-R92Q in glucose-rich media for 5 days.

Data are n≥3; mean ± SEM; significance assessed by Student's t-test (A, C, F-H) or by ANOVA using Holm-Sidak correction for multiple comparisons (I) and defined by  $P > 0.05$  (ns),  $P < 0.05$  (\*),  $P \leq 0.01$  (\*\*).
